# Supplementary material for: Component-Resolved Diagnosis Based on a Recombinant Variant of Mus m 1 Lipocalin Allergen
Source: MDPI journal article supplement (doi:10.3390/ijms24021193), 2023-01-07
Supplement: s1 [file s1]

## SUPPLEMENTARY MATERIAL TO:

*Research Article*

# Component-resolved diagnosis based on a recombinant variant of Mus m 1 lipocalin allergen

Elena Ferrari <sup>1\*</sup>, Daniela Breda <sup>2</sup>, Alberto Spisni <sup>1</sup> and Samuele E. Burastero <sup>2</sup>

<sup>1</sup> Department of Medicine and Surgery, University of Parma, Parma, Italy

<sup>2</sup> Division of Immunology, Transplantation and Infectious Diseases, San Raffaele Scientific Institute, Milan, Italy

\* Correspondence: elena.ferrari@unipr.it

### CONTENTS (order of citation):

**Figure S1.** Amino acid sequence alignment of *central* mouse Major Urinary Proteins.

**Figure S2.** Amino acid sequence alignment of Mus m 1.0102 allergen (a *central* Major Urinary Protein) and *peripheral* Major Urinary Proteins.

**Figure S3.** Graphical output of the B-cell epitope prediction by Discotope 2.0.

**Table S1.** List of the residues predicted by DiscoTope 2.0 as parts of B-cell epitopes

**Table S2.** List of residue scores obtained by SEPPA 3.0

**Figure S4.** Conformational epitopes predicted by SEPPA 3.0.

**Figure S5.** Protein characterization.

**Table S3.** Correlation analysis of indirect ELISA data

**Figure S6.** ROC curves of ELISA data based on rMus m 1.0102 and urinary nMus m 1 allergens (laboratory and commercial preparations).

CLUSTAL O(1.2.4) multiple sequence alignment

```

EMBOSS_001          -----EASSTGRNFNVEKINGEWHTIILASDKREKIEDNGNFRLF      41
sp|P11589|MUP2_MOUSE -MKMLLLLCLGLTLVCVHAEEASSTGRNFNVEKINGEWHTIILASDKREKIEDNGNFRLF      59
sp|P04938|MUP11_MOUSE MKMLLLLCLGLTLVCVHAEEASSTGRNFNVEKINGEWHTIILASDKREKIEDNGNFRLF      60
sp|P11588|MUP1_MOUSE  -MKMLLLLCLGLTLVCVHAEEASSTGRNFNVEKINGEWHTIILASDKREKIEDNGNFRLF      59
tr|A9R9W0|A9R9W0_MOUSE -MKMLLLLCLGLTLVCVHAEEASSTGRNFNQKINGEWHTIILASDKREKIEDNGNFRLF      59
tr|A2CEK7|A2CEK7_MOUSE -MKMLLLLCLGLTLVCVHAEEASSTGRNFNVEKINGEWHTIILASDKREKIEDNGNFRLF      59
tr|Q58EV3|Q58EV3_MOUSE -MKMLLLLCLGLTLVCVHAEEASSTGRNFNVEKINGEWHTIILASDKREKIEDNGNFRLF      59
tr|A2AKN8|A2AKN8_MOUSE -MKMLLLLCVGLTLVCVHAEEASSTGRNFNVEKINGEWHTIILASDKREKIEDNGNFRLF      59
sp|B5X0G2|MUP17_MOUSE -MKMLLLLCLGLTLVCVHAEEASSTGRNFNVEKINGEWHTIILASDKREKIEEHGNFRLF      59
tr|A2CEK6|A2CEK6_MOUSE -MKMLLLLCLGLTLVCVHAEEASSTGRNFNVEKINGEWHTIILASDKREKIEEHGNFRLF      59
                        *****:*****:*****

EMBOSS_001          LEQIHVLEKSLVLKFHTVRDEECSELSMVADKTEKAGEYSVTYDGFNTFTIPKTDYDNFL      101
sp|P11589|MUP2_MOUSE  LEQIHVLEKSLVLKFHTVRDEECSELSMVADKTEKAGEYSVTYDGFNTFTIPKTDYDNFL      119
sp|P04938|MUP11_MOUSE LEQIHVLENSLVLKFHTVRDEECSELSMVADKTEKAGEYSVTYDGFNTFTIPKTDYDNFL      120
sp|P11588|MUP1_MOUSE  LEQIHVLENSLVLKFHTVRDEECSELSMVADKTEKAGEYSVTYDGFNTFTIPKTDYDNFL      119
tr|A9R9W0|A9R9W0_MOUSE LEQIHVLENSLVLKFHTVRDEECSELSMVADKTEKAGEYSVTYDGFNTFTIPKTDYDNFL      119
tr|A2CEK7|A2CEK7_MOUSE LEQIRVLENSLVLKFHTVRDEECSELSMVADKTEKAGEYSVTYDGFNTFTIPKTDYDNFL      119
tr|Q58EV3|Q58EV3_MOUSE LEQIHVLENSLVLKVHTVRDEECSELSMVADKTEKAGEYSVTYDGFNTFTIPKTDYDNFL      119
tr|A2AKN8|A2AKN8_MOUSE LEQIRVLENSLVLKVHTVRDEECSELSMVADKTEKAGEYSVTYDGFNTFTIPKTDYDNFL      119
sp|B5X0G2|MUP17_MOUSE LEQIHVLENSLVLKVHTVRDEECSELSMVADKTEKAGEYSVTYDGFNTFTIPKTDYDNFL      119
tr|A2CEK6|A2CEK6_MOUSE LEQIHVLENSLVLKVHTVRDEECSELSMVADKTEKAGKYSVTYDGFNTFTIPKTDYDNFL      119
                        ****.***.*****.******:*****:*****

EMBOSS_001          MAHLINEKDGETFQLMGLYGREPDLSSDIKERFAQLCEEHGILRENIIDLSNANRCLQAR      161
sp|P11589|MUP2_MOUSE  MAHLINEKDGETFQLMGLYGREPDLSSDIKERFAKLCEEHGILRENIIDLSNANRCLQAR      179
sp|P04938|MUP11_MOUSE MAHLINEKDGETFQLMGLYGREPDLSSDIKERFAQLCEEHGILRENIIDLSNANRCLQAR      180
sp|P11588|MUP1_MOUSE  MAHLINEKDGETFQLMGLYGREPDLSSDIKERFAQLCEKHGILRENIIDLSNANRCLQAR      179
tr|A9R9W0|A9R9W0_MOUSE MAHLINEKDGETFQLMGLYGREPDLSSDIKERFAQLCEKHGILRENIIDLSNANRCLQAR      179
tr|A2CEK7|A2CEK7_MOUSE MAHLINEKDGETFQLMGLYGREPDLSSDIKERFAQLCEEHGILRENIIDLSNANRCLQAR      179
tr|Q58EV3|Q58EV3_MOUSE MAHLINEKDGETFQLMGLYGREPDLSSDIKERFAQLCEKHGILRENIIDLSNANRCLQAR      179
tr|A2AKN8|A2AKN8_MOUSE MAHLINEKDGETFQLMGLYGREPDLSSDIKERFAQLCEEHGILRENIIDLSNANRCLQAR      179
sp|B5X0G2|MUP17_MOUSE MAHLINEKDGETFQLMGLYGREPDLSSDIKERFAQLCEEHGILRENIIDLSNANRCLQAR      179
tr|A2CEK6|A2CEK6_MOUSE MAHLINEKDGETFQLMGLYGREPDLSSDIKERFAQLCEEHGILRENIIDLSNANRCLQAR      179
                        *****:***:*****

EMBOSS_001          E*  162
sp|P11589|MUP2_MOUSE  E-  180
sp|P04938|MUP11_MOUSE E-  181
sp|P11588|MUP1_MOUSE  E-  180
tr|A9R9W0|A9R9W0_MOUSE E-  180
tr|A2CEK7|A2CEK7_MOUSE E-  180
tr|Q58EV3|Q58EV3_MOUSE E-  180
tr|A2AKN8|A2AKN8_MOUSE E-  180
sp|B5X0G2|MUP17_MOUSE E-  180
tr|A2CEK6|A2CEK6_MOUSE E-  180
                        *

```

**Figure S1.** Amino acid sequence alignment of *central* mouse Major Urinary Proteins. Align tool, running the Clustal Omega algorithm to find sections of identity/similarity, was used for multiple sequence alignment. Consensus symbols: asterisk indicates a position which has a fully conserved residue; colon indicates a position which has a substitution between amino acids with similar properties (roughly equivalent to scoring > 0.5 in the Gonnet PAM 250 matrix [27]); period indicates a position which has almost one substitution between amino acids of weakly similar properties (roughly equivalent to scoring ≤ 0.5 and >0 in the Gonnet PAM 250 matrix). Each protein is represented by its accession number in UniProtKB database, while the query protein Mus m 1.0102 is indicated as EMBOSS\_001 (dashed line at the beginning of the sequence indicates omission of the secretion signal).

# CLUSTAL O(1.2.4) multiple sequence alignment

```

EMBOSS_001          -----EASSTGRNFNVEKINGEWHTIILASDKREKIEDNGNF      38
sp|Q5FW60|MUP20_MOUSE ---MKLLVLLLCGLTLVLCVHAEEASSMERNFNVEKINGEWYTIIMLATDKREKIEEHGSM      57
tr|A2AV72|A2AV72_MOUSE ----MKLLLLLCGLTLVLCVHAEEASSMGRNFNVEKINGEWYTIILASDKRAKIEEHGIM      55
sp|P11591|MUP5_MOUSE ----MKLLLLLCLELTLVYVHAEEASSEGNLNVEKINGKNFSILLASDKREKIEEHGTM      56
sp|P11590|MUP4_MOUSE ----MKLLLCGLTLVLCIHAEEATSKGQNLNVEKINGEWFISILLASDKREKIEEHGSM      54
tr|Q3KQQ2|Q3KQQ2_MOUSE MKLLLPLLLLLCLELTLVLCIHAEESSMERNFNVEQISGYWFSIAEASDEREKIEEHGSM      60
sp|P04939|MUP3_MOUSE MKLLLPLLLLLCLELTLVLCIHAEESSMERNFNVEQISGYWFSIAEASDEREKIEEHGSM      60
tr|Q80YX8|Q80YX8_MOUSE ---MKLLLLLCGLTIVLCIQAEEYSSMGRNFNVEQISGYWFSIAEASDEREKIEEHGSM      57
sp|P02762|MUP6_MOUSE ----MKMLLLLCGLTLVLCVHAEEASSTGRNFNVEKINGEWHTIILASDKREKIEDNGNF      56
                        **:* :*:***:*.* :*: * :* :*:***:* :

EMBOSS_001          RLFLEQIHVLEKSLVLKFHTVRDEECSELSMVADKTEKAGEYSVTYDGFNTFTIPKTDYD      98
sp|Q5FW60|MUP20_MOUSE RVFVEYIHVLENSLALKFHIIINEECSEIFLVADKTEKAGEYSVTYDGSNTFTILKTDYD      117
tr|A2AV72|A2AV72_MOUSE RLFVEHIHVLENSLGFKFHTVIDEECSEIFLVADKTEKAGEYSVTYDGFKKFTVLKTDYD      115
sp|P11591|MUP5_MOUSE RVFVEHIDVLENSLAFKFHTVIDEECTEIIYLADKTEKAGEYSVTYDGFNTFTILKTDYD      116
sp|P11590|MUP4_MOUSE RVFVEHIHVLENSLAFKFHTVIDGECSEIFLVADKTEKAGEYSVMYDGFNTFTILKTDYD      114
tr|Q3KQQ2|Q3KQQ2_MOUSE RAFVENITVLENSLVFKFHLIVNEECTEMTAIGEQTAKAGIYYMNYDGFNTFSILKTDYD      120
sp|P04939|MUP3_MOUSE RAFVENITVLENSLVFKFHLIVNEECTEMTAIGEQTAKAGIYYMNYDGFNTFSILKTDYD      120
tr|Q80YX8|Q80YX8_MOUSE RAFVENITVLENSLVFKFHLIVNEECTEMTLIGEETAKAGIYYLNYDGFNTFTILKTDYD      117
sp|P02762|MUP6_MOUSE RLFLEQIHVLENSLVLKFHTVRDEECSELSMVADKTEKAGEYSVTYDGFNTFTIPKTDYD      116
                        * :* * :***:* :*** : : * :* : : : :***** * : *** :* : : *****

EMBOSS_001          NFLMAHLINEKDGETFQLMGLYGREPDLSSDIKERFAQLCEEHGILRENIIDLSNANRCL      158
sp|Q5FW60|MUP20_MOUSE NYIMIHLINKKDGETFQLMELYGREPDLSSDIKEKFAQLSEEHGIVRENIIDLTNANRCL      177
tr|A2AV72|A2AV72_MOUSE NYIMFHLINEMNGETFQLMSLYGREPDLNSDIKEKFVKLCEEHGIIRENIIDFTKTNRCL      175
sp|P11591|MUP5_MOUSE NYIMFHLINKKDEENFQLMELFGREPDLSSDIKEKFAKLCEEHGIVRENIIDLSNANRCL      176
sp|P11590|MUP4_MOUSE NYIMFHLINEKDGETFQLMELYGRKADLNSDIKEKFVKLCEEHGIIRENIIDLTNTNRCL      174
tr|Q3KQQ2|Q3KQQ2_MOUSE NYIMIHLINKKDGETFQLMELYGREPDLSDIKEKFAKLCEEHGIIRENIIDLTVNVRCL      180
sp|P04939|MUP3_MOUSE NYIMIHLINKKDGETFQLMELYGREPDLSDIKEKFAKLCEEHGIIRENIIDLTVNVRCL      180
tr|Q80YX8|Q80YX8_MOUSE NYIMIYLINEKDGETFQLMELYGREPYLSLDIKEKFAKLCEEHGIIRENIIDLTVNVRCL      177
sp|P02762|MUP6_MOUSE NFLMAHLINEKDGETFQLMGLYGREPDLSSDIKERFAQLCEEHGILRENIIDLSNANRCL      176
                        * :* :***: : : :***** * :* : * :***** :* :* :***** : : :*****

EMBOSS_001          QARE*          162
sp|Q5FW60|MUP20_MOUSE EARE -          181
tr|A2AV72|A2AV72_MOUSE QARE -          179
sp|P11591|MUP5_MOUSE QARE -          180
sp|P11590|MUP4_MOUSE KARE -          178
tr|Q3KQQ2|Q3KQQ2_MOUSE EARE -          184
sp|P04939|MUP3_MOUSE EARE -          184
tr|Q80YX8|Q80YX8_MOUSE EARE -          181
sp|P02762|MUP6_MOUSE QARE -          180
                        :***

```

**Figure S2.** Amino acid sequence alignment of Mus m 1.0102 allergen (a *central* Major Urinary Protein) and *peripheral* Major Urinary Proteins. Align tool, running the Clustal Omega algorithm to find sections of identity/similarity, was used for multiple sequence alignment. Consensus symbols: asterisk indicates a position which has a single, fully conserved residue; colon indicates a position which has at least one substitution between amino acids with similar properties (roughly equivalent to scoring > 0.5 in the Gonnet PAM 250 matrix [27]); period indicates a position which has almost one substitution between amino acids of weakly similar properties (roughly equivalent to scoring ≤ 0.5 and >0 in the Gonnet PAM 250 matrix); absence of a symbol corresponds to non-conservative substitutions. Each protein is represented by its accession number in UniProtKB database, while the query protein rMus m 1.0102 is indicated as EMBOSS\_001 (dashed line at the beginning of the sequence indicates omission of the secretion signal).

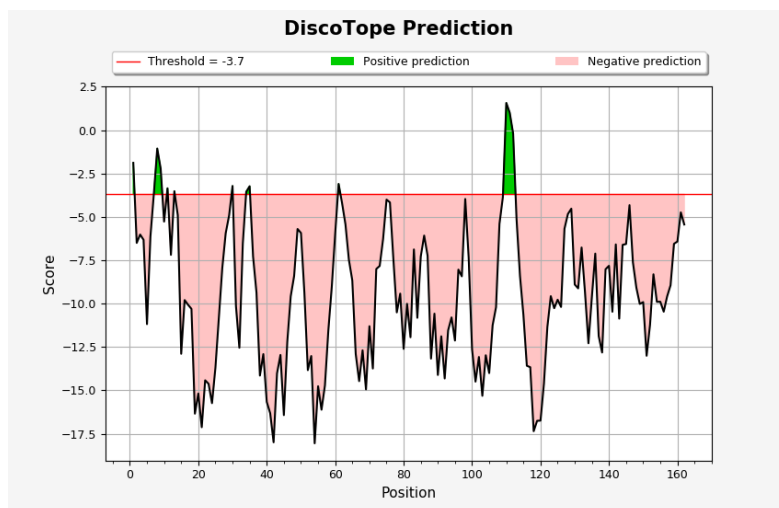

**Figure S3.** Graphical output of the B-cell epitope prediction by Discotope 2.0.

**Table S1.** List of the residues predicted by Discotope 2.0 as parts of B-cell epitopes

| Residue     | Contact No. | Propensity score | Discotope score |
|-------------|-------------|------------------|-----------------|
| <b>E1*</b>  | 8           | -1.089           | -1.884          |
| <b>G7</b>   | 4           | -3.642           | -3.684          |
| <b>R8</b>   | 8           | -0.156           | -1.058          |
| <b>N9</b>   | 8           | -1.465           | -2.217          |
| <b>N11</b>  | 10          | -2.486           | -3.351          |
| <b>E13</b>  | 1           | -3.848           | -3.521          |
| <b>E30</b>  | 4           | -3.115           | -3.217          |
| <b>D34</b>  | 1           | -3.884           | -3.553          |
| <b>N35</b>  | 3           | -3.262           | -3.232          |
| <b>D61</b>  | 0           | -3.502           | -3.1            |
| <b>D110</b> | 1           | 1.903            | 1.569           |
| <b>G111</b> | 0           | 1.136            | 1.006           |
| <b>E112</b> | 4           | 0.293            | -0.201          |

\* The color code corresponds to epitope highlighting in Figure 1C and 1D.

**Table S2.** List of residue scores obtained by SEPPA 3.0 server

| chainID  | resSeq   | resName    | score*       | location         |
|----------|----------|------------|--------------|------------------|
| A        | 1        | GLU        | 0.065        | surface          |
| A        | 2        | GLU        | 0.056        | surface          |
| A        | 3        | ALA        | 0.056        | surface          |
| A        | 4        | SER        | 0.069        | surface          |
| A        | 5        | SER        | 0.057        | surface          |
| A        | 6        | THR        | 0.064        | surface          |
| A        | 7        | GLY        | 0.078        | surface          |
| <b>A</b> | <b>8</b> | <b>ARG</b> | <b>0.094</b> | <b>surface</b> § |
| A        | 9        | ASN        | 0.069        | surface          |
| A        | 10       | PHE        | 0.070        | surface          |
| A        | 11       | ASN        | 0.072        | surface          |
| A        | 12       | VAL        | 0.055        | surface          |
| A        | 13       | GLU        | 0.052        | surface          |
| A        | 14       | LYS        | 0.062        | surface          |
| A        | 15       | ILE        | 0.000        | core             |
| A        | 16       | ASN        | 0.048        | surface          |
| A        | 17       | GLY        | 0.046        | surface          |
| A        | 18       | GLU        | 0.057        | surface          |
| A        | 19       | TRP        | 0.000        | core             |
| A        | 20       | HIS        | 0.071        | surface          |
| A        | 21       | THR        | 0.000        | core             |
| A        | 22       | ILE        | 0.000        | core             |
| A        | 23       | ILE        | 0.051        | surface          |
| A        | 24       | LEU        | 0.041        | surface          |
| A        | 25       | ALA        | 0.000        | core             |
| A        | 26       | SER        | 0.000        | core             |
| A        | 27       | ASP        | 0.049        | surface          |
| A        | 28       | LYS        | 0.071        | surface          |
| A        | 29       | ARG        | 0.059        | surface          |
| A        | 30       | GLU        | 0.070        | surface          |
| A        | 31       | LYS        | 0.067        | surface          |
| A        | 32       | ILE        | 0.000        | core             |
| A        | 33       | GLU        | 0.068        | surface          |
| A        | 34       | ASP        | 0.077        | surface          |
| A        | 35       | ASN        | 0.079        | surface          |
| A        | 36       | GLY        | 0.062        | surface          |
| A        | 37       | ASN        | 0.054        | surface          |
| A        | 38       | PHE        | 0.048        | surface          |
| A        | 39       | ARG        | 0.066        | surface          |
| A        | 40       | LEU        | 0.042        | surface          |
| A        | 41       | PHE        | 0.061        | surface          |
| A        | 42       | LEU        | 0.039        | surface          |
| A        | 43       | GLU        | 0.041        | surface          |
| A        | 44       | GLN        | 0.037        | surface          |
| A        | 45       | ILE        | 0.038        | surface          |
| A        | 46       | HIS        | 0.041        | surface          |
| A        | 47       | VAL        | 0.048        | surface          |
| A        | 48       | LEU        | 0.056        | surface          |
| A        | 49       | GLU        | 0.060        | surface          |
| A        | 50       | LYS        | 0.059        | surface          |
| A        | 51       | SER        | 0.057        | surface          |
| A        | 52       | LEU        | 0.000        | core             |
| A        | 53       | VAL        | 0.040        | surface          |
| A        | 54       | LEU        | 0.033        | surface          |
| A        | 55       | LYS        | 0.038        | surface          |
| A        | 56       | PHE        | 0.040        | surface          |
| A        | 57       | HIS        | 0.064        | surface          |
| A        | 58       | THR        | 0.086        | surface          |

|   |     |     |       |            |
|---|-----|-----|-------|------------|
| A | 59  | VAL | 0.129 | surface    |
| A | 60  | ARG | 0.141 | surface    |
| A | 61  | ASP | 0.197 | surface \$ |
| A | 62  | GLU | 0.171 | surface    |
| A | 63  | GLU | 0.153 | surface    |
| A | 64  | CYS | 0.130 | surface    |
| A | 65  | SER | 0.099 | surface    |
| A | 66  | GLU | 0.055 | surface    |
| A | 67  | LEU | 0.043 | surface    |
| A | 68  | SER | 0.035 | surface    |
| A | 69  | MET | 0.035 | surface    |
| A | 70  | VAL | 0.046 | surface    |
| A | 71  | ALA | 0.000 | core       |
| A | 72  | ASP | 0.055 | surface    |
| A | 73  | LYS | 0.061 | surface    |
| A | 74  | THR | 0.057 | surface    |
| A | 75  | GLU | 0.060 | surface    |
| A | 76  | LYS | 0.068 | surface    |
| A | 77  | ALA | 0.064 | surface    |
| A | 78  | GLY | 0.000 | core       |
| A | 79  | GLU | 0.053 | surface    |
| A | 80  | TYR | 0.000 | core       |
| A | 81  | SER | 0.049 | surface    |
| A | 82  | VAL | 0.044 | surface    |
| A | 83  | THR | 0.050 | surface    |
| A | 84  | TYR | 0.047 | surface    |
| A | 85  | ASP | 0.069 | surface    |
| A | 86  | GLY | 0.120 | surface    |
| A | 87  | PHE | 0.065 | surface    |
| A | 88  | ASN | 0.000 | core       |
| A | 89  | THR | 0.046 | surface    |
| A | 90  | PHE | 0.034 | surface    |
| A | 91  | THR | 0.036 | surface    |
| A | 92  | ILE | 0.038 | surface    |
| A | 93  | PRO | 0.040 | surface    |
| A | 94  | LYS | 0.039 | surface    |
| A | 95  | THR | 0.000 | core       |
| A | 96  | ASP | 0.043 | surface    |
| A | 97  | TYR | 0.048 | surface    |
| A | 98  | ASP | 0.047 | surface    |
| A | 99  | ASN | 0.049 | surface    |
| A | 100 | PHE | 0.048 | surface    |
| A | 101 | LEU | 0.036 | surface    |
| A | 102 | MET | 0.042 | surface    |
| A | 103 | ALA | 0.031 | surface    |
| A | 104 | HIS | 0.033 | surface    |
| A | 105 | LEU | 0.034 | surface    |
| A | 106 | ILE | 0.053 | surface    |
| A | 107 | ASN | 0.000 | core       |
| A | 108 | GLU | 0.144 | surface    |
| A | 109 | LYS | 0.142 | surface    |
| A | 110 | ASP | 0.169 | surface \$ |
| A | 111 | GLY | 0.220 | surface \$ |
| A | 112 | GLU | 0.196 | surface \$ |
| A | 113 | THR | 0.128 | surface    |
| A | 114 | PHE | 0.081 | surface    |
| A | 115 | GLN | 0.052 | surface    |
| A | 116 | LEU | 0.039 | surface    |
| A | 117 | MET | 0.000 | core       |
| A | 118 | GLY | 0.000 | core       |
| A | 119 | LEU | 0.000 | core       |
| A | 120 | TYR | 0.039 | surface    |
| A | 121 | GLY | 0.000 | core       |

|          |            |            |              |                |
|----------|------------|------------|--------------|----------------|
| A        | 122        | ARG        | 0.054        | surface        |
| A        | 123        | GLU        | 0.073        | surface        |
| <b>A</b> | <b>124</b> | <b>PRO</b> | <b>0.093</b> | <b>surface</b> |
| <b>A</b> | <b>125</b> | <b>ASP</b> | <b>0.104</b> | <b>surface</b> |
| A        | 126        | LEU        | 0.069        | surface        |
| A        | 127        | SER        | 0.080        | surface        |
| A        | 128        | SER        | 0.075        | surface        |
| A        | 129        | ASP        | 0.075        | surface        |
| A        | 130        | ILE        | 0.063        | surface        |
| A        | 131        | LYS        | 0.072        | surface        |
| A        | 132        | GLU        | 0.067        | surface        |
| A        | 133        | ARG        | 0.060        | surface        |
| A        | 134        | PHE        | 0.000        | core           |
| A        | 135        | ALA        | 0.058        | surface        |
| A        | 136        | GLN        | 0.056        | surface        |
| A        | 137        | LEU        | 0.047        | surface        |
| A        | 138        | CYS        | 0.000        | core           |
| A        | 139        | GLU        | 0.046        | surface        |
| A        | 140        | GLU        | 0.046        | surface        |
| A        | 141        | HIS        | 0.043        | surface        |
| A        | 142        | GLY        | 0.048        | surface        |
| A        | 143        | ILE        | 0.046        | surface        |
| A        | 144        | LEU        | 0.050        | surface        |
| A        | 145        | ARG        | 0.048        | surface        |
| A        | 146        | GLU        | 0.050        | surface        |
| A        | 147        | ASN        | 0.050        | surface        |
| A        | 148        | ILE        | 0.046        | surface        |
| A        | 149        | ILE        | 0.056        | surface        |
| A        | 150        | ASP        | 0.069        | surface        |
| A        | 151        | LEU        | 0.065        | surface        |
| <b>A</b> | <b>152</b> | <b>SER</b> | <b>0.093</b> | <b>surface</b> |
| <b>A</b> | <b>153</b> | <b>ASN</b> | <b>0.107</b> | <b>surface</b> |
| A        | 154        | ALA        | 0.074        | surface        |
| A        | 155        | ASN        | 0.088        | surface        |
| <b>A</b> | <b>156</b> | <b>ARG</b> | <b>0.108</b> | <b>surface</b> |
| <b>A</b> | <b>157</b> | <b>CYS</b> | <b>0.112</b> | <b>surface</b> |
| <b>A</b> | <b>158</b> | <b>LEU</b> | <b>0.114</b> | <b>surface</b> |
| <b>A</b> | <b>159</b> | <b>GLN</b> | <b>0.138</b> | <b>surface</b> |
| <b>A</b> | <b>160</b> | <b>ALA</b> | <b>0.145</b> | <b>surface</b> |
| <b>A</b> | <b>161</b> | <b>ARG</b> | <b>0.136</b> | <b>surface</b> |
| <b>A</b> | <b>162</b> | <b>GLU</b> | <b>0.124</b> | <b>surface</b> |

\*Residues with a score higher than the threshold (0.089) are predicted as epitope residues (*in bold*).

<sup>§</sup>Residues in blue, red, and green were predicted also by Discotope 2.0 as parts of B-cell epitopes (see Figure 1, epitopes I, II, III).



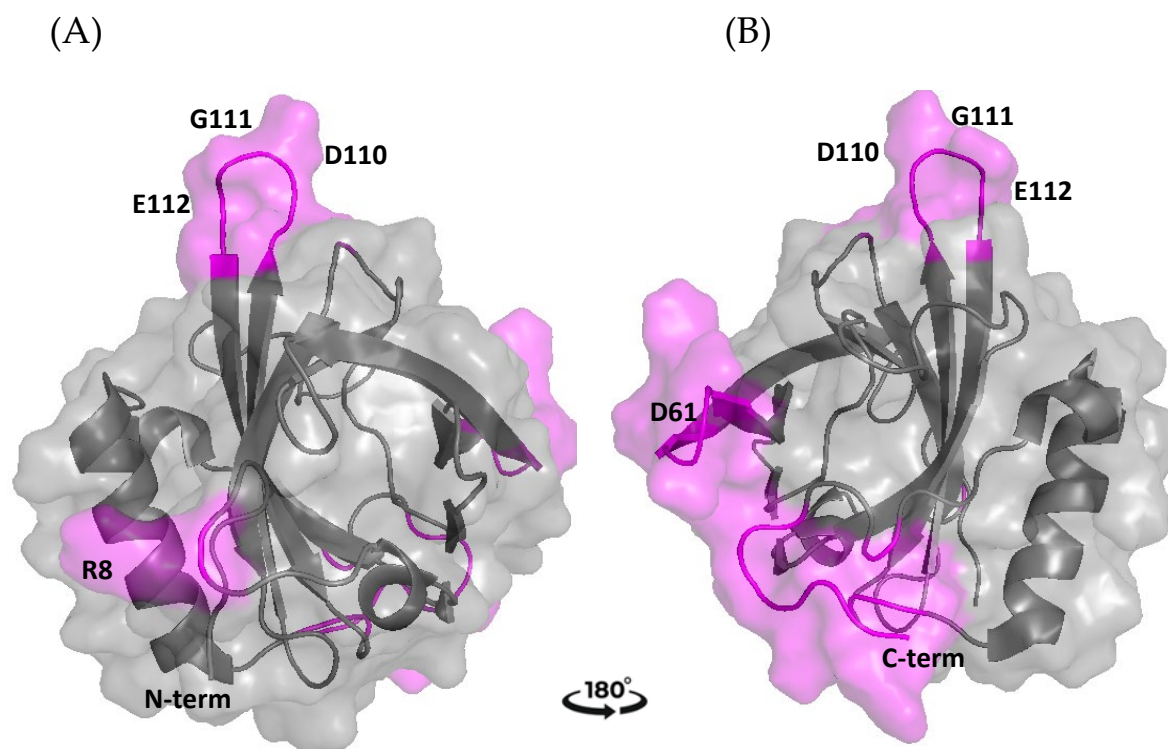

**Figure S4.** Conformational epitopes predicted by SEPPA 3.0. (A,B) The magenta regions of surface and cartoon representations of rMus m 1.0102 solution structure (PDB code 1df3, model 1) correspond to predicted B-cell epitopes. Labeled epitope residues (R8, D61, D110, G111, E112) were predicted also by Discotope 2.0 as parts of B-cell epitopes (Figure 1C,D). (A) bottom view of the central cavity, (B) top view of the cavity, generated by a 180° turn.



(A)

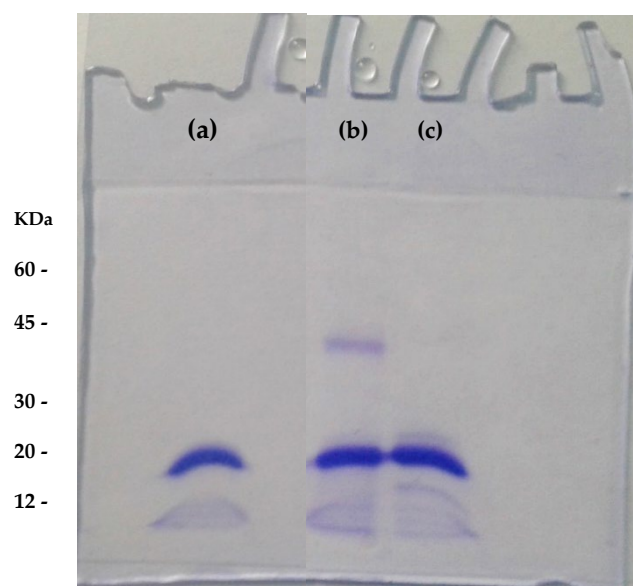

(B)

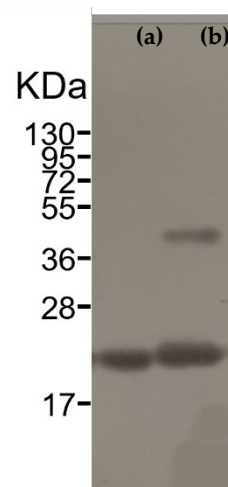

(C)

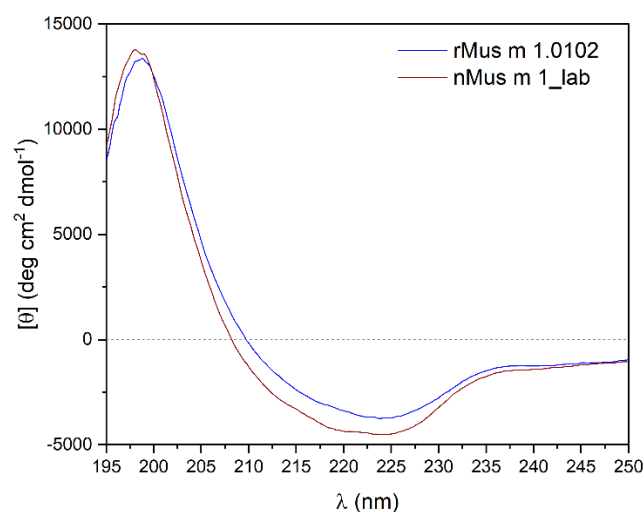

**Figure S5.** Protein characterization. (A) SDS-PAGE and (B) western blot analyses of rMus m 1.0102 (lanes a), laboratory (lanes b), and commercial (Indoor Biotechnologies) (lane c) preparations of urinary nMus m 1. Apparently, the band at 40 kDa of the laboratory preparation of nMus m 1 might be ascribed to a dimer formation, possibly due to a cysteine reoxidation reaction. The low molecular weight bands appreciable at <20 kDa of nMus m 1 commercial preparation sample might be due to a partial degradation process. (C) CD spectra for rMus m 1.0102 and nMus m 1 laboratory preparation samples, acquired in the far-UV region.

**Table S3.** Correlation analysis of indirect ELISA data

| Variables                                    | Spearman corr. Coefficient | p-Value  |
|----------------------------------------------|----------------------------|----------|
| <i>- ELISA data:</i>                         |                            |          |
| rMus m 1.0102/ <sup>a</sup> nMus m 1         | 0.51496                    | 0.02875* |
| rMus m 1.0102/ <sup>b</sup> nMus m 1         | 0.43627                    | 0.07999  |
| <sup>a</sup> nMus m 1/ <sup>b</sup> nMus m 1 | 0.64461                    | 0.00521* |
| <i>- ELISA data vs. ImmunoCAP ISAC data:</i> |                            |          |
| rMus m 1.0102/Mus m 1-specific IgE           | 0.55005                    | 0.01803* |

\* Significant *p*-value at the 0.05 level  
<sup>a</sup> nMus m 1 laboratory preparation; <sup>b</sup> nMus m 1 commercial preparation.

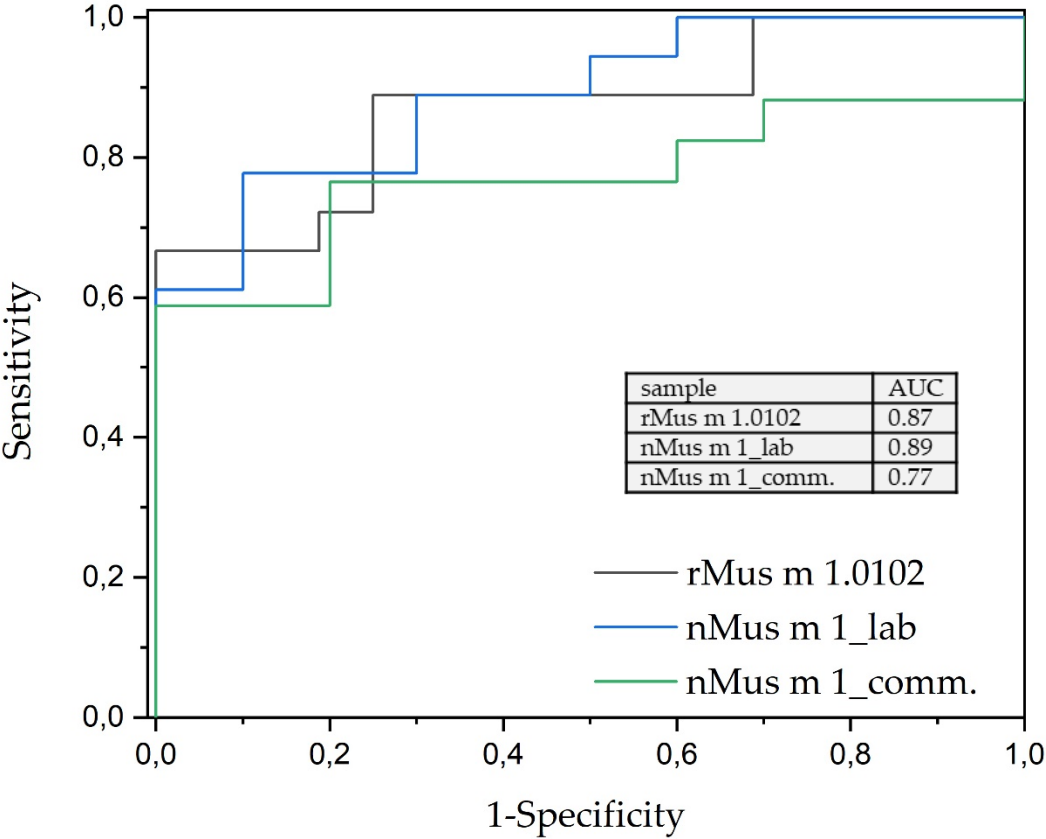

**Figure S6.** ROC curves of ELISA data based on rMus m 1.0102 and urinary nMus m 1 allergens (laboratory and commercial preparations). Data were obtained with control and allergic sera.
